# Supplementary material
Source: PubMed Central journal article supplement (PMC3570029)

**Supplementary data**

Title page

**Role of VPO1, a newly identified heme-containing  
peroxidase, in ox-LDL induced endothelial cell apoptosis**

Yong-Ping Bai<sup>1, 3\*</sup>, Chang-Ping Hu<sup>2\*</sup>, Qiong Yuan<sup>2</sup>, Jun Peng<sup>2</sup>, Rui-Zheng Shi<sup>1</sup>,  
Tian-Lun Yang<sup>1</sup>, Ze-Hong Cao<sup>4</sup>, Yuan-Jian Li<sup>2</sup>, Guangjie Cheng<sup>4#</sup>, Guo-Gang  
Zhang<sup>1#</sup>

<sup>1</sup> Department of Cardiovascular Medicine, Xiangya Hospital, Central South University, Changsha, 410008, China; <sup>2</sup> Department of Pharmacology, School of Pharmaceutical Sciences, Central South University, Changsha 410078, China; <sup>3</sup> Department of Geriatric Medicine, Xiangya Hospital, Central South University, Changsha, 410008, China; <sup>4</sup>Division of Pulmonary, Allergy & Critical Care Medicine, Department of Medicine, University of Alabama at Birmingham, Birmingham, AL 35294, USA

\*These two authors contributed equally to this work.

Correspondence:

Prof. Guo-Gang Zhang, Department of Cardiovascular Medicine, Xiangya Hospital, Central South University, Xiangya Road 87<sup>#</sup>, Changsha 410008, China. Tel: 086-731-84327695, Fax: 086-731-84327695, E-mail: [xvzgg2006@sina.com](mailto:xvzgg2006@sina.com)

Or Dr. Guangjie Cheng, Division of Pulmonary, Allergy & Critical Care Medicine, Department of Medicine, University of Alabama at Birmingham, Birmingham, AL 35294, USA. E-mail: [gjcheng@uab.edu](mailto:gjcheng@uab.edu); Phone: 205-975-8919; Fax: 205-935-8565.

## **1. SUPPLEMENTARY MATERIALS AND METHODS**

### **1.1 Materials**

Fluorescent  $\text{OCl}^-$  (hypochlorite) detection kit was purchased from Cell Technology, Inc.(USA).

### **1.2 Detection of intracellular HOCl by APF and HPF**

To further directly determine the intracellular generation of HOCl, we used fluorescent  $\text{OCl}^-$  (hypochlorite) detection kit. The two probes, aminophenyl fluorescein (APF) and hydroxyphenyl fluorescein (HPF), are cell permeable and can be used in combination to detect hypochlorite ( $\text{OCl}^-$ ) production in cells. Hypochlorite can be detected by loading two samples, one with APF and the other with HPF. Hypochlorite production is visualized by increase in fluorescence of APF loaded cells and no increase in fluorescence in HPF loaded cells. As described previously<sup>1</sup>, endothelial cells were cultured in black, clear bottomed 6 well plates (Costar). On the day of the experiment, cells were washed twice in PBS and incubated in modified Hanks' balanced salt solution containing 10.0 mM HEPES, 1.0 mM  $\text{MgCl}_2$ , 2.0 mM  $\text{CaCl}_2$ , and 2.7 mM glucose adjusted to pH  $7.3 \pm 0.05$ . The cells were loaded with HPF or APF (10  $\mu\text{M}$ ) for 30 min at room temperature. Dye-loaded cells were pre-treated with 600  $\mu\text{M}$  apocynin or 10  $\mu\text{M}$  DPI for 1 h, and then exposed to ox-LDL (100  $\mu\text{g/ml}$ ) for 30 min. Typical fluorescence images using Nikon Eclipse fluorescence microscope and quantification of fluorescence with fluorescence plate reader were obtained. The excitation and emission filters were 488 nm and 515 nm respectively.

**SUPPLEMENTARY FIGURE LEGENDS**

**Figure S1 Detection of intracellular HOCl by APF and HPF probe.** A and B, Intracellular HOCl level was determined by APF and HPF. C Typical fluorescence images which loaded with HPF or APF. Control, wild-type cells were incubated in modified Hanks' balanced salt solution for 30 min. ox-LDL (100 µg /ml), wild-type cells were treated with 100 µg/ml ox-LDL for 30min. +DPI, cells were pretreated with 10 µM DPI ( the specific NADPH oxidase inhibitor) for 1h prior to ox-LDL exposure; + apocynin, cells were pretreated with 600 µM apocynin for 1h prior to ox-LDL exposure. +gp91<sup>phox</sup> siRNA: after successful gp91<sup>phox</sup> siRNA transfection, cells were incubated in modified Hanks' balanced salt solution containing ox-LDL (100 µg /ml) for 30 min; + VPO1 shRNA, after successful VPO1 shRNA transfection, cells were incubated in modified Hanks' balanced salt solution containing ox-LDL (100 µg /ml) for 30 min. gp91<sup>phox</sup> siRNA: cells with successful gp91<sup>phox</sup> siRNA transfection were incubated in modified Hanks' balanced salt solution for 30 min; VPO1 shRNA, cells with successful VPO shRNA transfection were incubated in modified Hanks' balanced salt solution for 30 min. DPI: cells were cultured in modified Hanks' balanced salt solution containing 10 µM DPI for 30 min; apocynin, cells were cultured in modified Hanks' balanced salt solution containing 600 µM apocynin for 30 min. \*\**P* < 0.01 vs control (0 µg/ml ox-LDL), ++ *P* < 0.01 vs ox-LDL (100 µg/ml). Data are expressed as mean ± SEM, n=6 each, performed in triplicate.

**SUPPLEMENTAL REFERENCE**

1. Setsukinai K, Urano Y, Kakinuma K, Majima HJ, Nagano T. Development of novel fluorescence probes that can reliably detect reactive oxygen species and distinguish specific species. *J Biol Chem.* **278**: 3170-5; 2003.

**Figure S1**

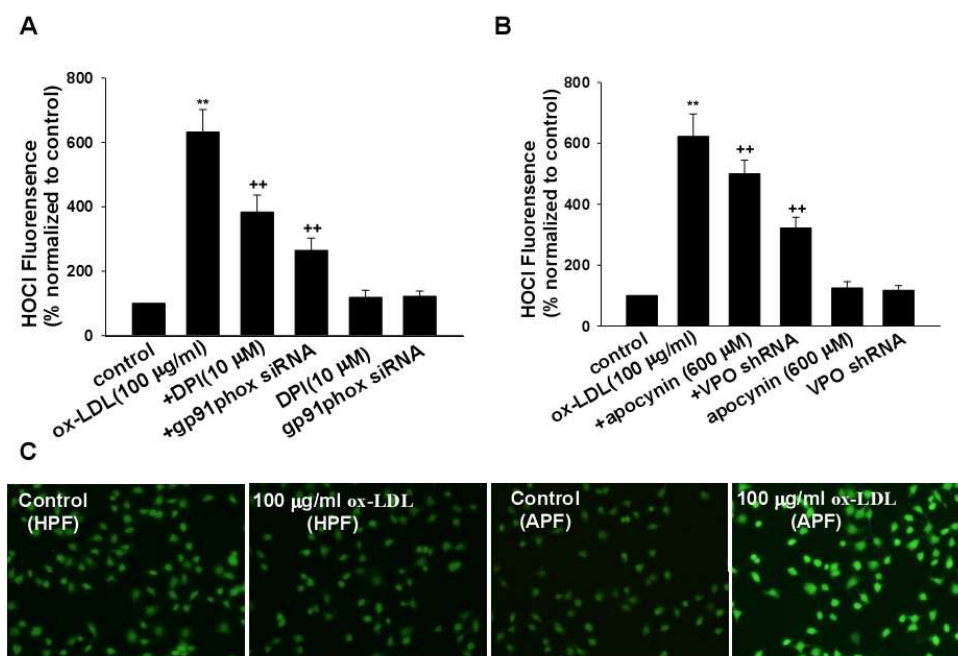

Supplement: NIHMS435969-supplement-MMC.pdf [file NIHMS435969-supplement-MMC.pdf]
